# Supplementary material
Source: PubMed Central journal article supplement (PMC539731)

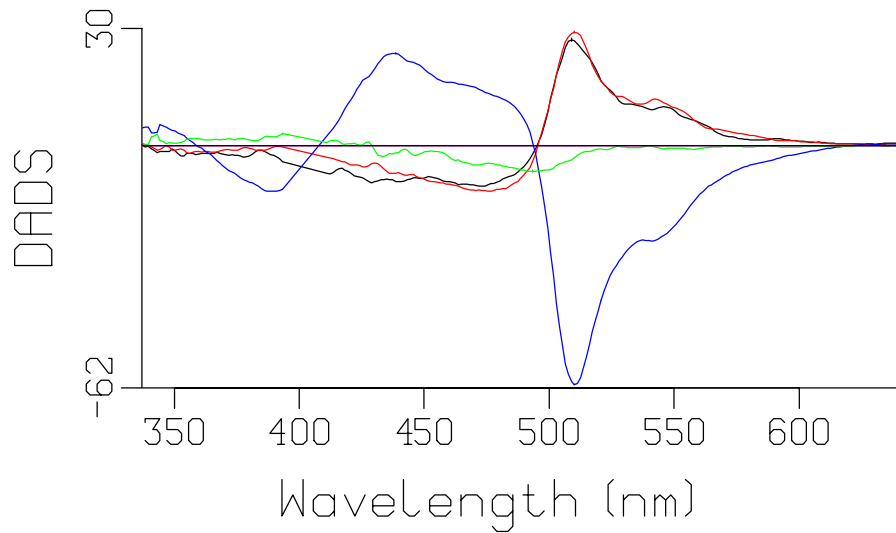

Supplement: pnas_101_52_17988__2.pdf [file pnas_101_52_17988__2.pdf]

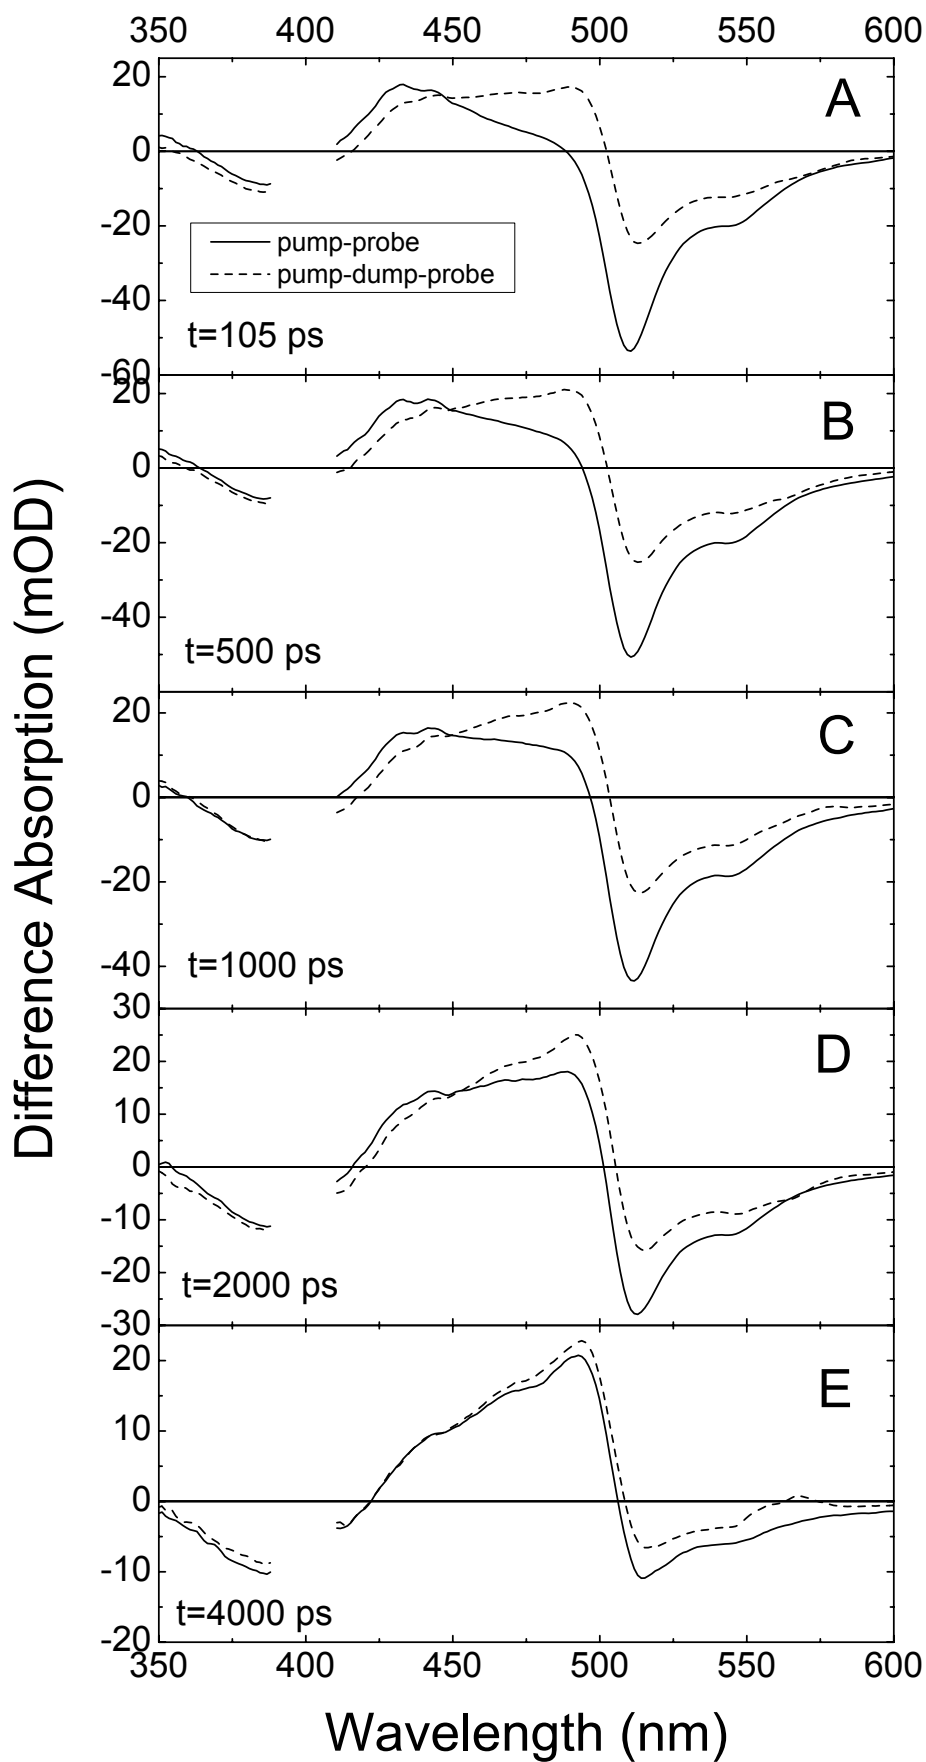

Supplement: pnas_101_52_17988__3.pdf [file pnas_101_52_17988__3.pdf]

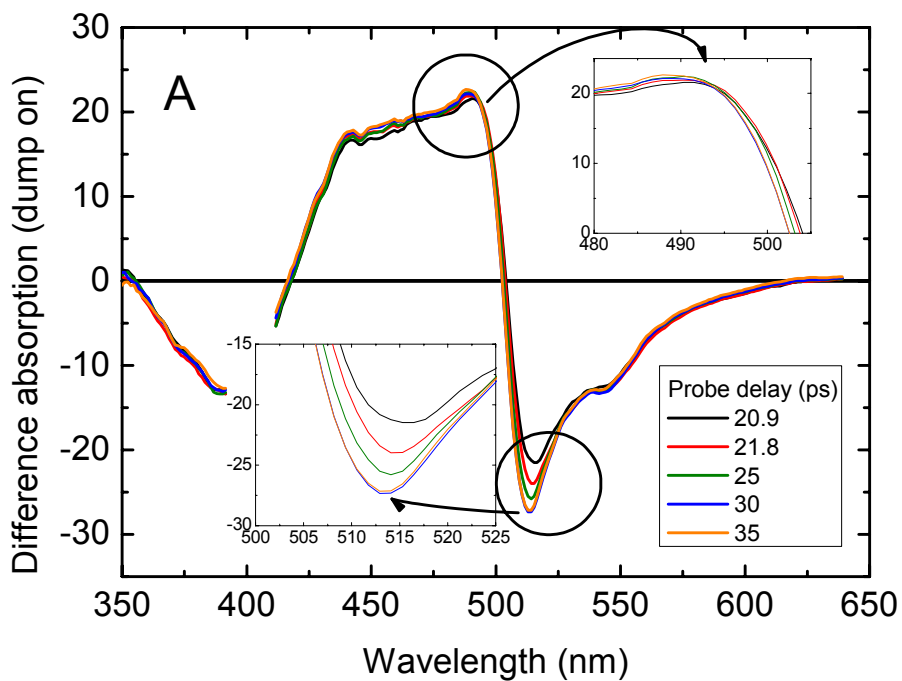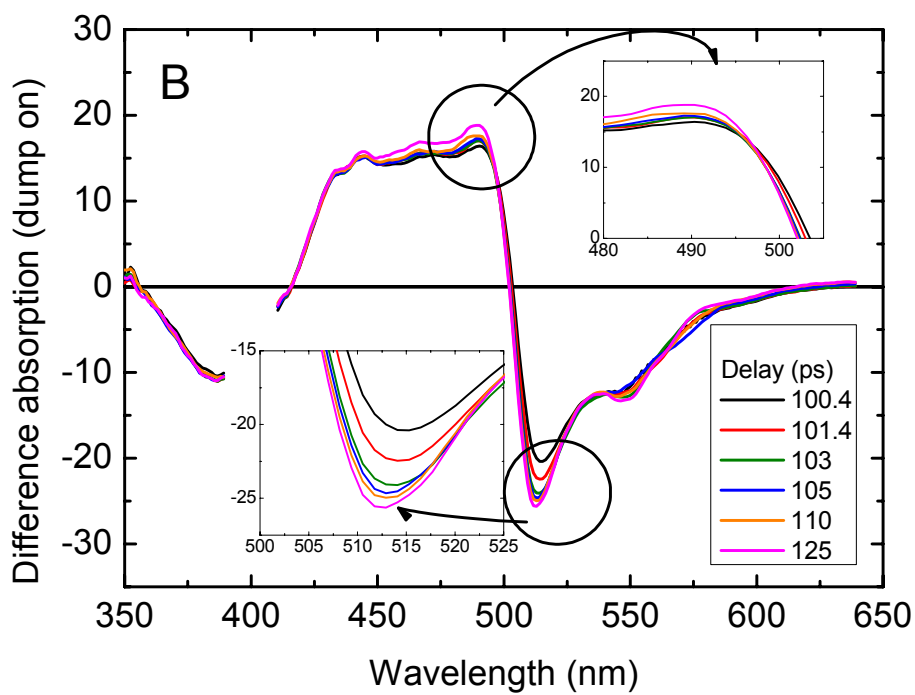

Supplement: pnas_101_52_17988__4.pdf [file pnas_101_52_17988__4.pdf]

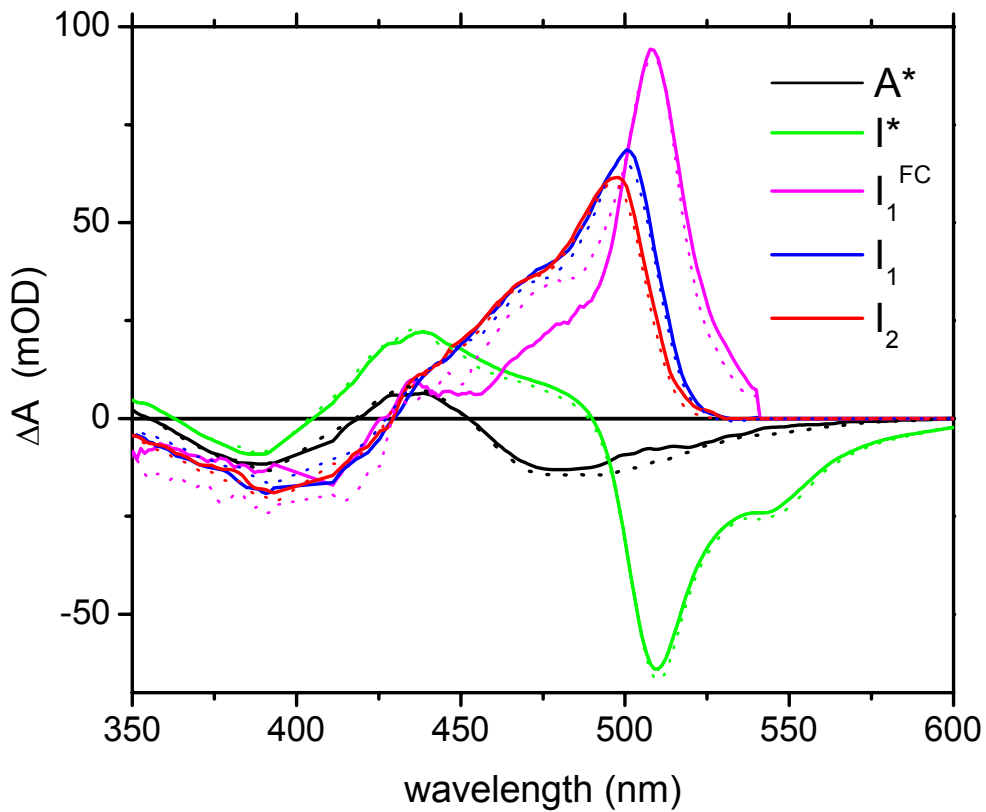

Supplement: pnas_101_52_17988__5.pdf [file pnas_101_52_17988__5.pdf]
